# Supplementary material for: First-dose mRNA vaccination is sufficient to reactivate immunological memory to SARS-CoV-2 in subjects who have recovered from COVID-19
Source: JCI journal article supplement (doi:10.1172/jci149150), 2021-05-03
Supplement: sd1 [file 1]

## **Supplementary methods**

### **Patients**

22 healthcare workers who received BNT162b2 mRNA COVID-19 vaccine were recruited at the Careggi University Hospital, Florence, Tuscany, Italy, by the Infectious and Tropical Diseases Unit. Among them, 11 had a previous history of symptomatic SARS-CoV-2 infection (COVID-19 recovered). Confirmation of SARS-CoV-2 infection was obtained by PCR analysis of nasopharyngeal swab. Absence of infection in naïve individuals was based on absence of symptoms, absence of anti-N and anti-S IgG before vaccination and routine monitoring by nasopharyngeal swab PCR testing). Among COVID-19 recovered individuals, disease severity was defined according to WHO guidelines (1). Main demographic and clinical characteristics are summarized in Supplementary Table S1. Following immunization schedule approved by the European Medicines Agency, each subject received two vaccine injections, 21 days apart. Blood samples were collected before the first dose (basal time, T0) and every 7 days (T7, T14, T21) until T28 (28 days after the first dose, 7 days after the second one) (Supplementary Figure S1). 75 additional individuals (57 naïve and 18 COVID-19 recovered) were also recruited in addition to the 22 previously described subjects to expand serological data on a larger cohort. These subjects (97 in total, 68 naïve and 29 recovered COVID-19) were serologically tested at day 0, 21 and 50 following vaccine administration. Recruited subjects were not affected by chronic medical conditions that may affect vaccine response, with the exception of only one individual in the COVID-19 recovered group who was under immune suppressive treatment following solid organ transplantation. Main demographic and clinical characteristics of the expanded cohort are summarized in Supplementary Table S2.

PBMNCs were obtained following density gradient centrifugation of blood samples using Lymphoprep (Axis Shield Poc As™) and were frozen in FCS plus 10% DMSO to be stored in liquid nitrogen. For each subject, longitudinal samples were defrost and analyzed together for B cells and T cells evaluation. Serum was frozen and stored for Ig levels evaluation.

### **Evaluation of SARS-CoV-2-Spike-reactive T cells**

For T cells stimulation in vitro, 1.5 million PBMNCs were cultured in complete RPMI plus 5% human AB serum in 96 well flat bottom plates in presence of medium alone (background, negative control) or of a pool of Spike SARS-CoV-2 peptide pools (Prot\_S1, Prot\_S+ and Prot\_S to achieve a complete sequence coverage of the Spike protein) at 0.6  $\mu$ M/peptide, accordingly to manufacturer's instructions (Miltenyi Biotech). Staphylococcal enterotoxin B SEB 1  $\mu$ g/ml (Sigma Aldrich) was used as a positive control. After 2 hours of incubation at 37°C, 5% CO<sub>2</sub>, Brefeldin A (5  $\mu$ g/mL) was added, followed by additional 4 hours incubation. Finally, cells were fixed and stained using fluorochrome-conjugated antibodies listed in Table S3 and Table S4. Samples were acquired on a BD LSR II flow cytometer (BD Biosciences). Flow cytometry experiments were performed using published guidelines (2).

### **Evaluation of SARS-CoV-2-Spike-specific IgM, IgA, IgG**

For B cells evaluation, 2 million PBMNCs were stained for 30 minutes at 4°C with fluorochrome-conjugated antibodies listed in Table S5, then washed with PBS/EDTA buffer (PEB), and incubated 5 minutes with 7-AAD for viability evaluation. Samples were acquired on a BD LSR II flow cytometer (BD Biosciences). Recombinant biotinylated SARS-Cov2 Spike protein (Miltenyi Biotech) was conjugated separately with streptavidin PE and PE-Cy7 for 15 minutes at room temperature and pooled in 1:2 ratio, before being added to final staining mix.

### **Evaluation of SARS-CoV-2-specific IgM and IgG**

Evaluation of SARS-CoV-2-Spike specific IgG (Diasorin), IgM (Abbott) and IgA (Euroimmun); Nucleoprotein-specific IgG (Abbott); RBD-specific IgG (Abbott); neutralizing Ab (Dia.Pro Diagnostic Bioprobes) was performed following manufacturer's instructions. The antibody reactivity of each specimen was expressed by the ratio between optical density and cut-off value (index) or as arbitrary units/ml.

### **Statistics**

Unpaired Mann-Whitney test was used to compare COVID-19 recovered subjects versus naïve subjects; Wilcoxon-Signed Rank test was used to compare different time points in each study group. In all cases, p values  $\leq 0.05$  were considered significant.

### **Supplementary References**

1. World Health Organization. Clinical management of COVID-19 interim guidance. WHO, Geneva. 27 May 2020. Available at: <https://apps.who.int/iris/bitstream/handle/10665/332196/WHO-2019-nCoV-clinical-2020.5-eng.pdf?sequence=1&isAllowed=y>
2. Cossarizza A, et al. Guidelines for the use of flow cytometry and cell sorting in immunological studies (second edition). *Eur J Immunol.* 2019 Oct;49(10):1457-1973. doi: 10.1002/eji.201970107. PMID: 31633216; PMCID: PMC7350392.

**Supplementary Table S1. Demographic and clinical features of subjects enrolled for the study of early kinetic of immune response following vaccination.**

| Case ID                   | Gender | Age   | COVID-19 | Time from COVID-19 diagnosis <sup>o</sup> to 1 dose vaccine (days) | Comorbidities |
|---------------------------|--------|-------|----------|--------------------------------------------------------------------|---------------|
| <b>Recovered COVID-19</b> |        |       |          |                                                                    |               |
| EC1                       | F      | 51    | severe   | 294                                                                | HBP, DYSL     |
| EC2                       | F      | 52    | mild     | 286                                                                |               |
| EC3                       | M      | 60    | moderate | 302                                                                | CKD           |
| EC4                       | M      | 65    | moderate | 312                                                                |               |
| EC5                       | F      | 53    | moderate | 289                                                                | Migraine      |
| EC6                       | M      | 37    | moderate | 297                                                                |               |
| EC7                       | F      | 54    | mild     | 293                                                                | DYSL          |
| EC8                       | M      | 61    | critical | 288                                                                | HBP           |
| EC9                       | M      | 64    | critical | 292                                                                | HBP, DYSL     |
| EC10                      | F      | 51    | mild     | 222                                                                |               |
| EC11                      | F      | 44    | moderate | 306                                                                |               |
|                           |        |       |          |                                                                    |               |
| <b>Median (years)</b>     | -      | 53    | -        | -                                                                  |               |
| <b>IQR</b>                | -      | 51-61 | -        | -                                                                  |               |
|                           |        |       |          |                                                                    |               |
| <b>Non-COVID-19</b>       |        |       |          |                                                                    |               |
| NC1                       | F      | 35    | no       | na                                                                 |               |
| NC2                       | F      | 61    | no       | na                                                                 | HBP           |
| NC3                       | F      | 44    | no       | na                                                                 |               |
| NC4                       | F      | 41    | no       | na                                                                 | DM, DYSL      |
| NC5                       | M      | 41    | no       | na                                                                 |               |
| NC6                       | M      | 32    | no       | na                                                                 |               |
| NC7                       | F      | 37    | no       | na                                                                 |               |
| NC8                       | F      | 29    | no       | na                                                                 |               |
| NC9                       | F      | 46    | no       | na                                                                 |               |
| NC10                      | F      | 24    | no       | na                                                                 |               |
| NC11                      | M      | 53    | no       | na                                                                 |               |
|                           |        |       |          |                                                                    |               |
| <b>Median (years)</b>     | -      | 41    | -        | -                                                                  |               |
| <b>IQR</b>                | -      | 32-46 | -        | -                                                                  |               |

Legend: HBP: high blood pressure; DM: diabetes mellitus; CKD: chronic kidney disease; DYSL:

Dyslipidaemia

*na denotes not applicable*

**Supplementary Table S2. Demographic and clinical features of subjects enrolled for serological analysis up to 50 days post vaccination.**

|                                                                       | Recovered COVID-19<br>N=29 | Non-COVID-19<br>N=68 |
|-----------------------------------------------------------------------|----------------------------|----------------------|
| Gender                                                                |                            |                      |
| - Male                                                                | 8 (28%)                    | 22 (32%)             |
| - Female                                                              | 21 (72%)                   | 46 (68%)             |
| Age                                                                   |                            |                      |
| - Median (IQR)                                                        | 53 (45-60)                 | 52 (36-60)           |
| - Range                                                               | 28-66                      | 23-70                |
| Comorbidities                                                         |                            |                      |
| - HBP                                                                 | 6                          | 10                   |
| - COPD                                                                | 0                          | 2                    |
| - Dyslipidaemia                                                       | 6                          | 4                    |
| - DM                                                                  | 1                          | 5                    |
| - CKD                                                                 | 1                          | 1                    |
| - CHD                                                                 | 1                          | 0                    |
| - SOT                                                                 | 0                          | 1                    |
| - Asthma                                                              | 1                          | 3                    |
| - Thyroid disorder                                                    | 2                          | 8                    |
| - Other*                                                              | 1                          | 3                    |
| COVID-19 severity <sup>#</sup>                                        |                            |                      |
| - asymptomatic/mild                                                   | 21                         | na                   |
| - moderate                                                            | 2                          |                      |
| - severe                                                              | 2                          |                      |
| - critical                                                            | 4                          |                      |
| Time from COVID-19 diagnosis <sup>°</sup><br>to 1 dose vaccine (days) |                            |                      |
| - Median (IQR)                                                        | 287 (270-293)              | na                   |
| - Range                                                               | 222-308                    |                      |

Legend: HBP: high blood pressure; COPD: Chronic obstructive pulmonary disease; DM: diabetes mellitus; CKD: chronic kidney disease; CHD: coronary heart disease; SOT: solid organ transplantation

\*including: MGUS (1), migraine (n=1), urticarial (n=1), glaucoma (n=1)

<sup>°</sup>first positive test on nasopharyngeal swab

**Supplementary Table S3. List of all fluorochrome mAbs used for flow cytometric analysis of antigen specific T cells.**

| <b>Antigen</b> | <b>Fluorochrome</b>         | <b>Clone</b> | <b>Company</b> |
|----------------|-----------------------------|--------------|----------------|
| TNF- $\alpha$  | FITC                        | 6401.1111    | BDBioscience   |
| CD154          | PE                          | TRAP1        | BDBioscience   |
| CD3            | PerCP                       | SK7          | BDBioscience   |
| CD4            | PE-Cy7                      | SK3          | Invitrogen     |
| CD8            | Super Bright 600            | SK1          | eBioscience™   |
| IL-2           | APC                         | MQ1-17H12    | BDBioscience   |
| IFN- $\gamma$  | Pacific Blue                | B27          | BioLegend      |
| L/D            | Fixable Viability Stain 780 |              | BDBioscience   |

**Supplementary Table S4. List of all fluorochrome mAbs used for flow cytometric analysis of immune checkpoint expression by antigen specific T cells.**

| <b>Antigen</b> | <b>Fluorochrome</b>         | <b>Clone</b> | <b>Company</b> |
|----------------|-----------------------------|--------------|----------------|
| TNF- $\alpha$  | FITC                        | MAb11        | BDBioscience   |
| IFN- $\gamma$  | FITC                        | 25723.11     | BDBioscience   |
| IL-2           | FITC                        | 5344.111     | BDBioscience   |
| CD8            | PerCP                       | SK1          | BDBioscience   |
| CD4            | eFluor506                   | RTA-T4       | Invitrogen     |
| CD3            | Pacific Blue                | UCHT1        | BDBioscience   |
| PD1 (CD279)    | PE-Cy7                      | EH12.2H7     | BioLegend      |
| TIGIT          | APC                         | MBSA43       | Invitrogen     |
| CD154          | PE                          | TRAP1        | BDBioscience   |
| L/D            | Fixable Viability Stain 780 |              | BDBioscience   |

**Supplementary Table S5. List of all fluorochrome mAbs used for flow cytometric analysis of antigen specific B cells.**

| <b>Antigen</b> | <b>Fluorochrome</b> | <b>Clone</b> | <b>Company</b> |
|----------------|---------------------|--------------|----------------|
| CD19           | APC-Vio770          | LT19         | Miltenyi       |
| CD27           | VioBright FITC      | M-T271       | Miltenyi       |
| IgA            | VioGreen            | IS11-8E10    | Miltenyi       |
| IgG            | VioBlue             | IS11-3B2.2.3 | Miltenyi       |
| CD14           | PerCP               | TÜK4         | Miltenyi       |
| IgM            | APC                 | PJ2-22H3     | Miltenyi       |
| CD3            | PerCP               | BW264/56     | Miltenyi       |
| 7AAD           |                     |              | Miltenyi       |
| Spike          | PE                  |              | Miltenyi       |
| Spike          | PE-Vio770           |              | Miltenyi       |



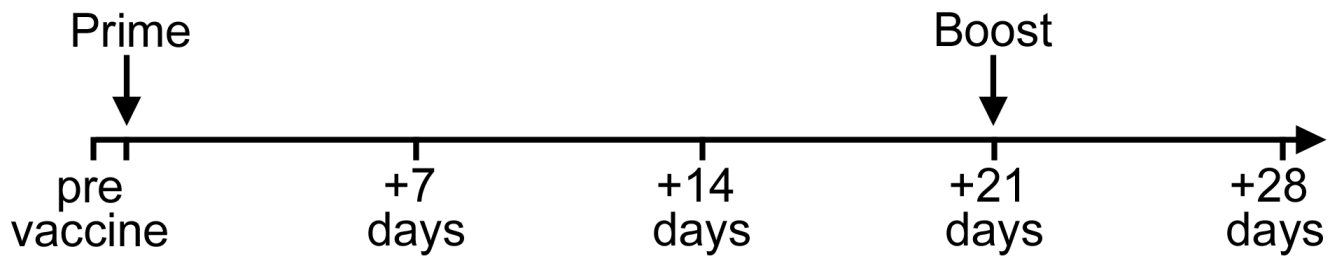

**Supplementary Figure S1. Vaccination schedule and time points of analysis**

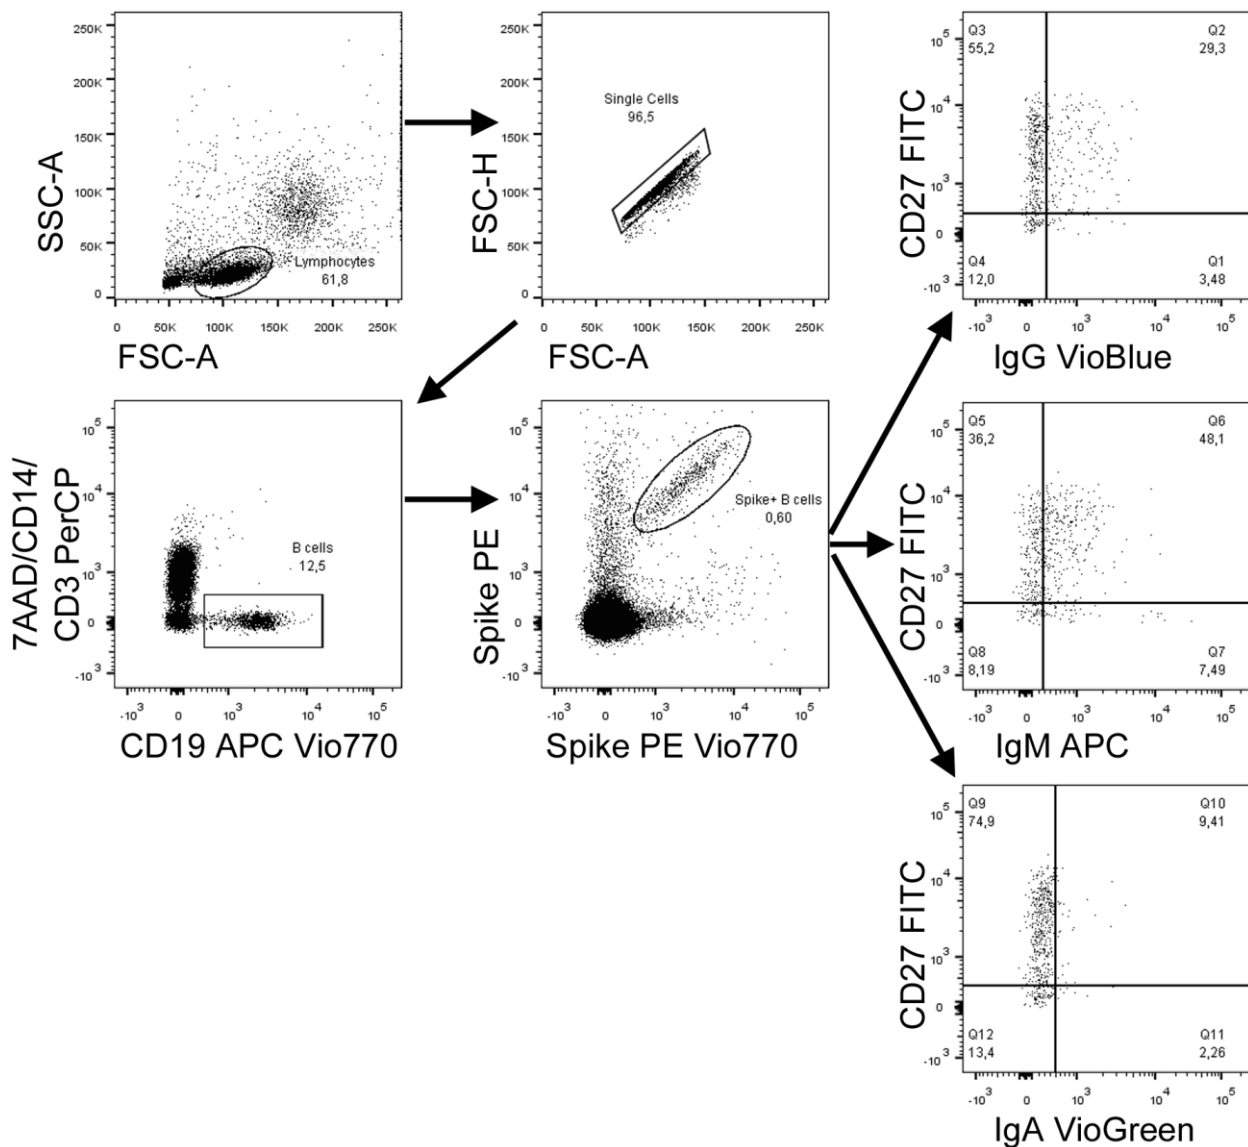

**Supplementary Figure 2: Gating strategy for the identification of spike-specific B cells**

Lymphocytes were gated based on physical parameters (FSC-SSC), then doublets were removed using FSC-A and FSC-A parameters. PerCP was used as dump channel for the exclusion of dead cells (7AAD), CD3+ T cells and CD14 monocytes. B cells were identified as CD19+. B cells binding PE- and PE Vio770-conjugated spike protein were then identified as spike-specific. Among spike-specific B cells we evaluated CD27 expression associated to IgG, IgM and IgA.

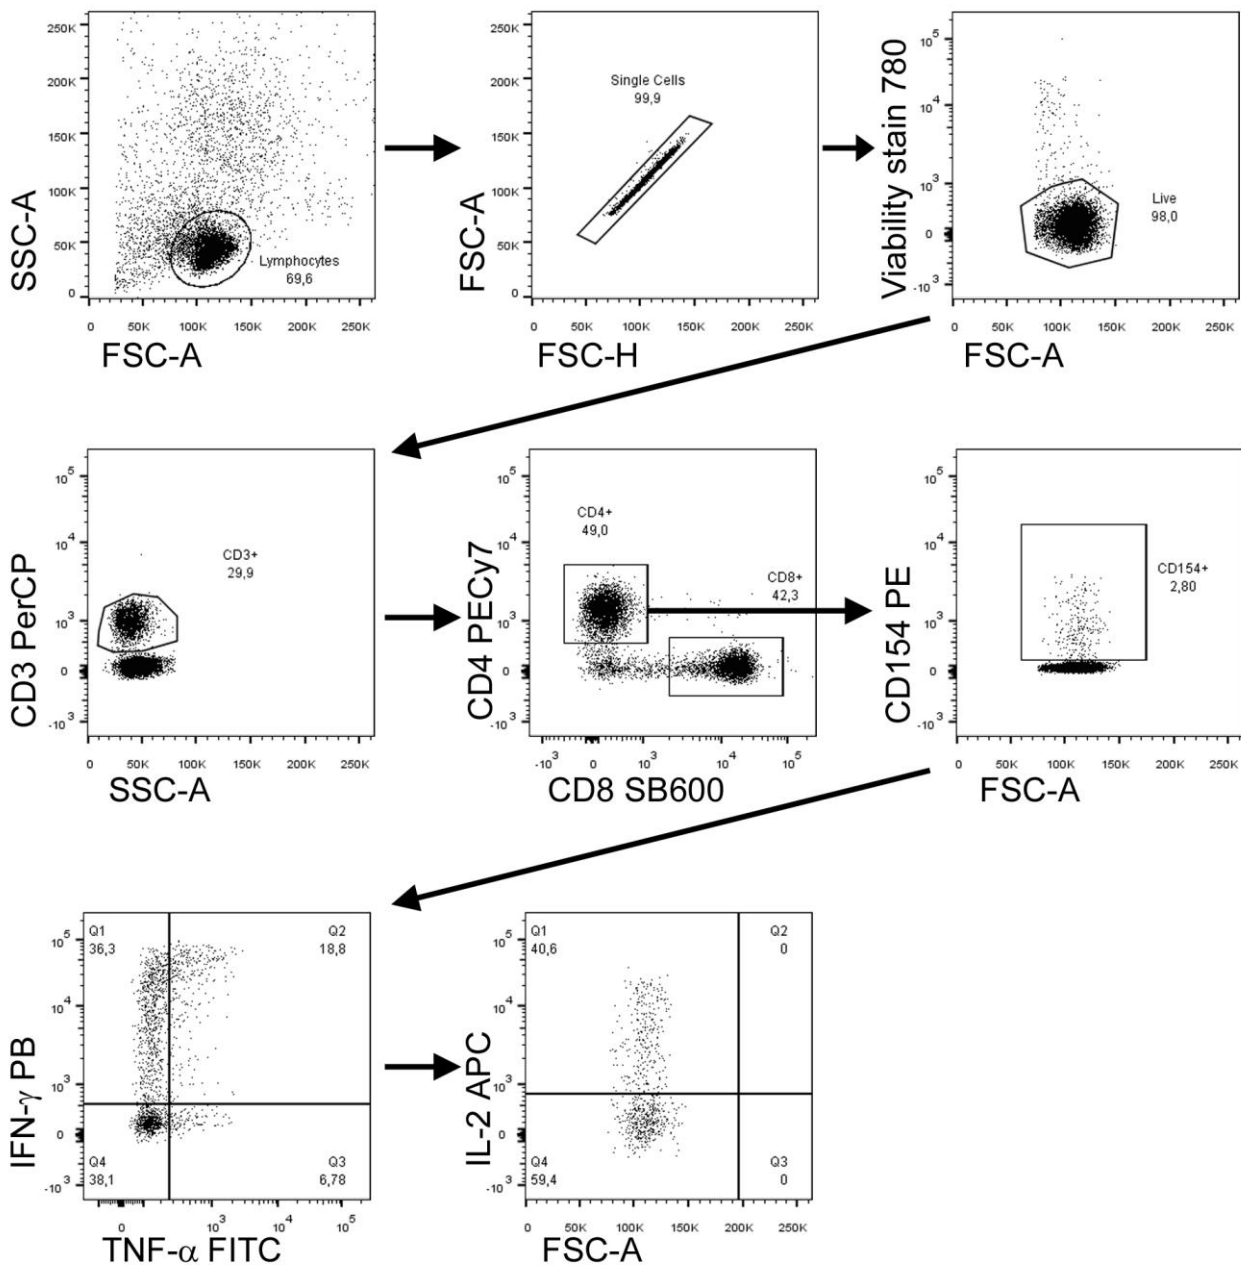

### Supplementary Figure 3: Gating strategy for the identification of spike-specific T cells

Lymphocytes were gated based on physical parameters (FSC-SSC), then doublets were removed using FSC-A and FSC-H parameters. Dead cells were excluded using viability stain 780. T cells were identified as CD3<sup>+</sup>. We then identified CD4<sup>+</sup> T cells. Among these, we identified CD154 expressing cells. CD4<sup>+</sup>CD154<sup>+</sup> T cells were then evaluated for IFN- $\gamma$ , TNF- $\alpha$  and IL-2 expression.

## **Supplementary Acknowledgments**

### **COVID-19 Research group**

Silvia Benemei<sup>1</sup>, Irene Campolmi<sup>1</sup>, Alberto Farese<sup>1</sup>, Marco Matucci Cerinic<sup>1,2</sup>, Fabrizio Niccolini<sup>1</sup>,  
Diana Paolini<sup>1</sup>, Marco Pozzi<sup>1</sup>, Matteo Tomaiuolo<sup>1</sup>.

1. Careggi University Hospital, Florence, Italy
2. Department of Experimental and Clinical Medicine, University of Florence, Florence, Italy.
